# Supplementary material for: A pentacyclic triterpene natural product, ursolic acid and its prodrug US597 inhibit targets within cell adhesion pathway and prevent cancer metastasis
Source: PubMed Central journal article supplement (PMC4496218; doi:10.18632/oncotarget.3261), 2015-03-19
Supplement: oncotarget-06-9295-s001.pdf [file oncotarget-06-9295-s001.pdf]

## SUPPLEMENTARY FIGURES AND TABLE

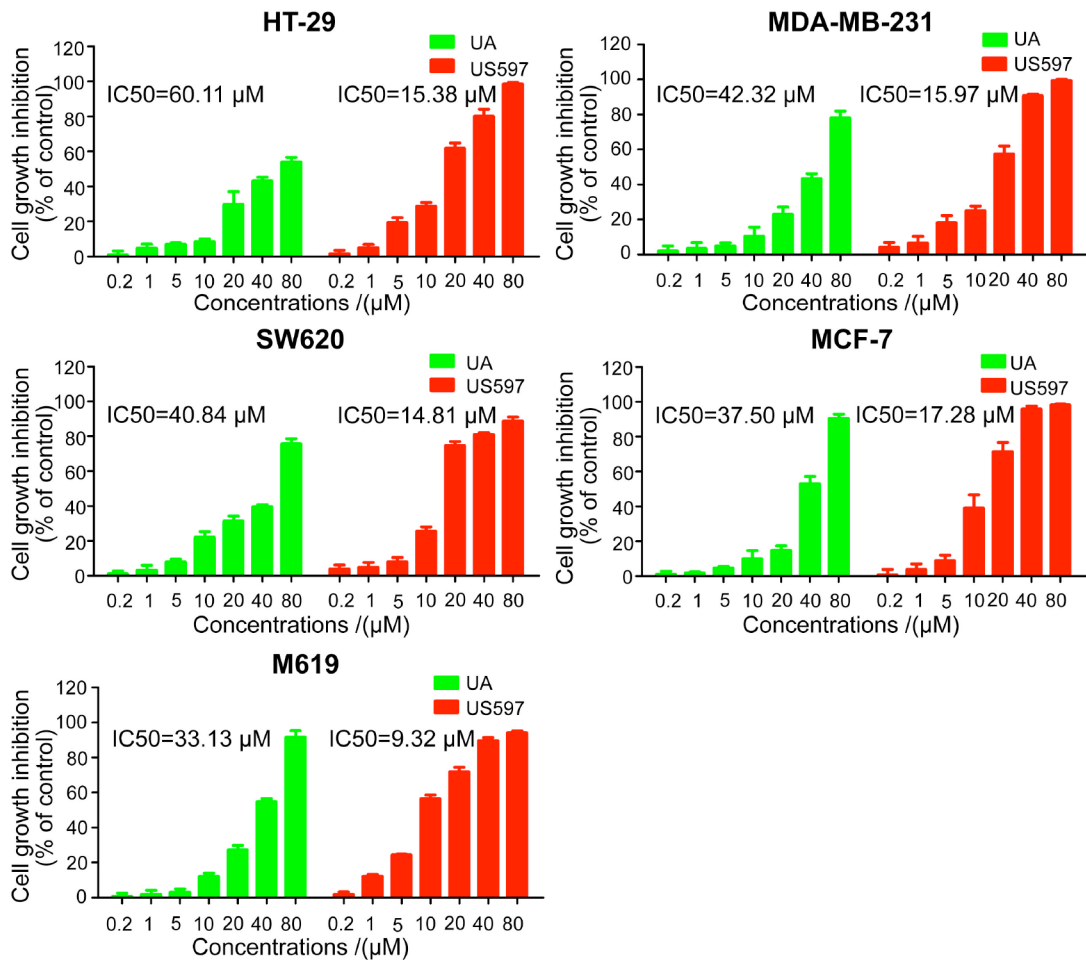

**Supplementary Figure S1:** HT29, SW620, MDA-MB-232, MCF-7 and M619 cells were treated with the indicated concentrations of UA/US597 for 24 h, and cell viability was evaluated by the MTT assay. Results are shown as mean  $\pm$  SD from three separate experiments in each experiment.

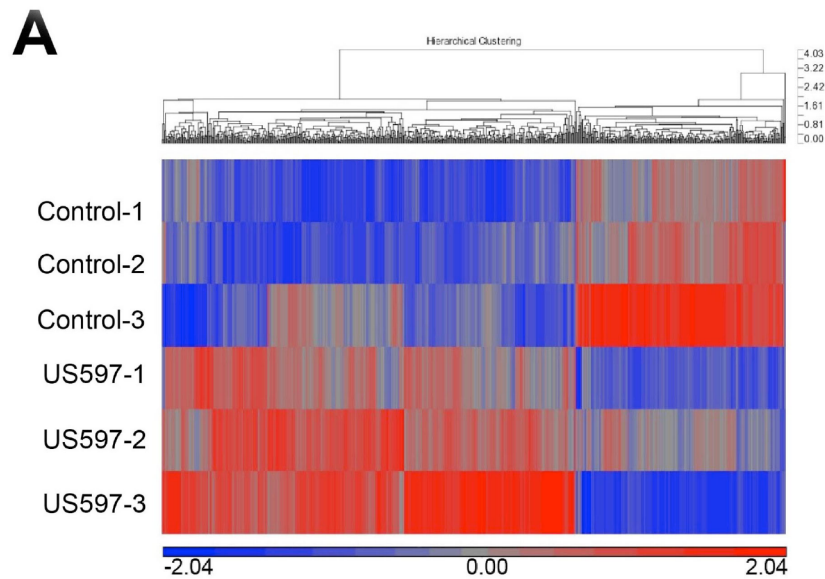

**B**

| Pathway description                         | Count | P-Value  | Genes name                                                                               |
|---------------------------------------------|-------|----------|------------------------------------------------------------------------------------------|
| p53 signaling pathway                       | 9     | 2.45E-03 | CCNE2, CCNB1, TP53I3, CCND3, SERPINE1, RPRM, IGFBP3, PTEN, ATM                           |
| Lysosome                                    | 10    | 2.14E-02 | LAMP2, SLC17A5, TPP1, AP3M1, HEXB, NEU1, CTSA, CD164, ASAH1, CTSL1                       |
| Focal adhesion                              | 13    | 4.99E-02 | ACTB, EGFR, XIAP, ITGA2, BIRC3, PTEN, COL4A6, CDC42, ARHGAP5, CCND3, ITGB8, VEGFA, PARVA |
| Amino sugar and nucleotide sugar metabolism | 5     | 6.76E-02 | PGM3, GNPDA1, MPI, GFPT1, HEXB                                                           |
| Valine, leucine and isoleucine degradation  | 5     | 6.76E-02 | MCCC2, IVD, ALDH1B1, HMGCS1, PCCB                                                        |
| Small cell lung cancer                      | 7     | 7.44E-02 | CCNE2, XIAP, SKP2, ITGA2, BIRC3, PTEN, COL4A6                                            |
| Hypertrophic cardiomyopathy (HCM)           | 7     | 7.78E-02 | ACTB, ACTC1, ITGB8, ITGA2, PRKAA2, TPM1, TPM3                                            |
| Alanine, aspartate and glutamate metabolism | 4     | 9.39E-02 | GLUL, ALDH5A1, GFPT1, ASNS                                                               |
| PPAR signaling pathway                      | 6     | 9.45E-02 | PPARA, OLR1, ACSL4, ACSL3, SLC27A2, FABP5                                                |
| Terpenoid backbone biosynthesis             | 3     | 9.59E-02 | HMGCR, HMGCS1, IDI1                                                                      |

Supplementary Figure S2: (A) Heat map depicting microarray gene expression profiling in HepG2 cells treated with 5  $\mu$ M US97 and compared with control. (B) Pathway analysis of the genes obtained from the NLP analysis. There were 134 pathways revealed. Among them, about 11 signaling pathways were significant ( $P < 0.01$ ).

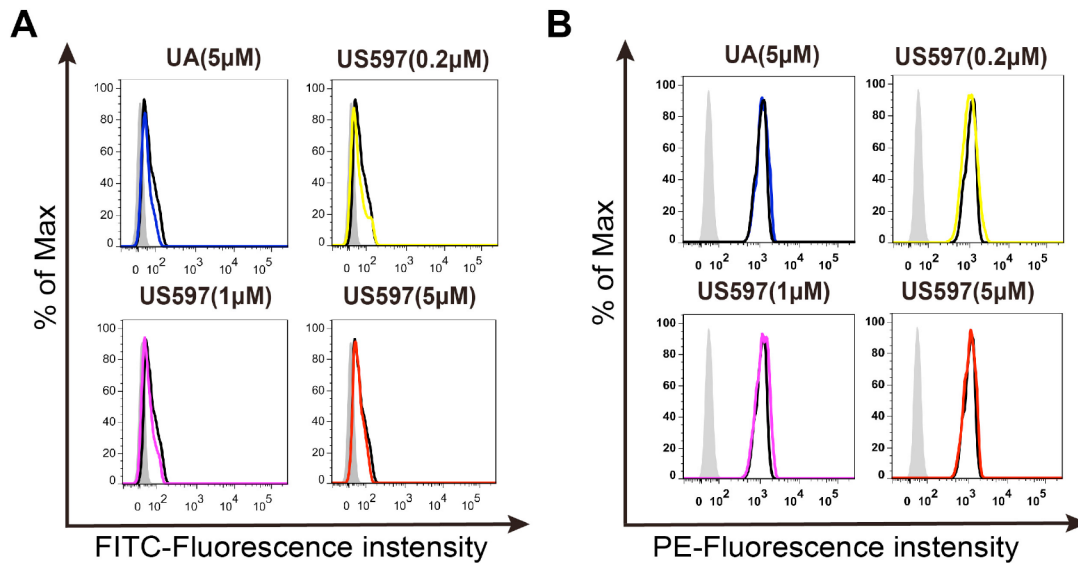

**Supplementary Figure S3:** Flow cytometric analysis the inhibitory effect of UA/US597 on the expression of integrin  $\alpha 4$  (A) and  $\alpha 5$  (B) on HepG2 cells, isotype control (silver area), control (blank curve), blue curve (5  $\mu$ M UA), yellow, purple and red line represents US597 treated group at concentrations of 0.2, 1 and 5  $\mu$ M, respectively.

**Supplementary Table S1:** Pharmacokinetic parameters of US597 after oral administration to SD rats ( $n = 5$ )

| Parameters                         | mean $\pm$ SD           |
|------------------------------------|-------------------------|
| $C_{max}$ ( $\mu$ g/mL)            | 0.014 $\pm$ 0.011       |
| $T_{max}$ (h)                      | 5.6 $\pm$ 3.578         |
| $t_{1/2}$ (h)                      | 13.173 $\pm$ 9.533      |
| $AUC_{(0-t)}$ ( $\mu$ g·h/mL)      | 0.155 $\pm$ 0.108       |
| $AUC_{(0-\infty)}$ ( $\mu$ g·h/mL) | 0.195 $\pm$ 0.099       |
| CL(mL/h/mg)                        | 501.275 $\pm$ 249.729   |
| $V_d$ (mL/g)                       | 9097.777 $\pm$ 6149.829 |
| $MRT_{0-t}$ (h)                    | 11.109 $\pm$ 1.776      |
| $MRT_{0-\infty}$ (h)               | 20.56 $\pm$ 10.797      |
